# Supplementary material
Source: publisher figshare collection journal article supplement (https://tandf.figshare.com/articles/dataset/_/9178736)
Supplement: Supplementary file 1 [file 1]

Archive with 12 entries (12 files):
- Data Set S1.xlsx
- Data Set S2.xlsx
- FS1.pdf
- FS2.pdf
- FS3.pdf
- FS4.pdf
- FS5.pdf
- FS6.pdf
- FS7.pdf
- S1-S7.pdf
- Supplemental Figure Legends.docx
- Table S1.docx
