# Supplementary material
Source: publisher figshare collection journal article supplement (https://tandf.figshare.com/articles/dataset/_/9178736)
Supplement: Supplementary file 1 [file 1 › Data Set S1.xlsx]

## Sheet: Sheet1
Data Set S1. Primers used in this study
Primer Name	Primer Sequence (5’-3’)
GUS staining
pCAMBIA1381-MtCAS31pro-F	CTGCAGTTTTGGCATCATATTTGGA
pCAMBIA1381-MtCAS31pro-R	GCGGCCGCGAGGTGGTGGAACATGTTGTGTTTTT
pCAMBIA1381-MtPIP2;7pro-F	GAATTCGGGGTATGCTTGCTCTATGCTAGTA
pCAMBIA1381-MtPIP2;7pro-R	GTCGACGTTTGTGTTCTTGTGTTTGTGCC
Subcellular localization
pE3025-MtPIP2;7-F (MtPIP2;7-GFP-F)	CTCGAGCATGGGCAAAGATGTTGAGGTTCAA
pE3025-MtPIP2;7-R (MtPIP2;7-GFP-R)	GAATTCAGCATTGCTCCTGAAGGATCC
pE3025-MtCAS31-F (MtCAS31-GFP-F)	CTCGAGCATGTCTCAAT ATCAACAAGGTTATG
pE3025-MtCAS31-R (MtCAS31-GFP-R)	GAATTCGTGTCCTTG CCATGTCCAGTAC
Overexpression vector
pMDC32-MtCAS31-F	TCTAGAATGGATTACAAAGATCATGATGGTGACTATAAGGACCACGACATCGATTACAAAGATGATGATGATAAATCTCAATATCAACAAGGTTA
pMDC32-MtCAS31-R	GAGCTCCTAGTGTCCTTGTCCATGTCC
TALEN vector
MtCAS31-TALEN-F	TAGACGTTCTCTATGCTCAATTTATTTAGATTTCAC
MtCAS31-TALEN-R	AAAGACTAATTAGTTACCTGTGTGGGTCC
MtPIP2;7-TALEN-F	GAATTTGATTGGCACATTTGATTCCTT
MtPIP2;7-TALEN-R	AGAGATACCGGCGGTGCAGTAA
Yeast two-hybrid
pGBKT7-MtCAS31-F	GAATTCATGTCTCAATATCAACAAGGTTATG
pGBKT7-MtCAS31-R	GTCGACCTAGTGTCCTTGTCCATGTCCAGT
pGADT7-MtATG8a-F	CTCGAGATGGAATATGAATATGATTGTGA
pGADT7-MtATG8a-R	CCCGGGTCAAGGTCCCAATGATTTTCCTC
pGADT7-Medtr2g023430-F	CATATG ATGTCTAAGGCTTCCTTCAAGACTC
pGADT7-Medtr2g023430-R	GGATCC CTAGTGGGAGGAACCAAAGGTGTTCTCT
pGADT7-Medtr4g048510-F	CATATGATGGCTAAGAGCTCATTCAAGACAG
pGADT7-Medtr4g048510-R	GGATCCTCAGATCATCATCCCAAATGTGTTCTC
pGADT7-Medtr4g101090-F	CATATGATGGCAAAGAGTTACTTCAAACAA
pGADT7-Medtr4g101090-R	GGATCCCTAATGGGAAATCAGATCTCCA
pGADT7-Medtr2g088230-F	CATATGATGGCTAAGAGTTCCTTCAAATTG
pGADT7-Medtr2g088230-R	GGATCCTCACATTAACATCCCAAAAGTGT
pGADT7-Medtr4g123760-F	CATATGATGGGCAAGATCAATTCCTTCAAACA
pGADT7-Medtr4g123760-R	GGATCCTTAACCAAATGTTTTCTCACTGCT
pGADT7-Medtr1g086310-F	CATATGATGGGAGGAGGTTCTTATTTCCAGA
pGADT7-Medtr1g086310-R	GGATCCTTATGTACAGTATCCGAATGTTTTCT
pGADT7-MtATG1-F	CCCGGGTATGGAATATGAATATGATTGTGA
pGADT7-MtATG1-R	CTCGAGTCAAGGTCCCAATGATTTTCCTC
pGADT7-MtATG5-F	CCCGGGTATGAATGAAGGACAAGAATACGTA
pGADT7-MtATG5-R	CTCGAGCTACTGCACAGGATTGGCTTCTGA
pGADT7-MtATG13-F	CCCGGGTATGGTATCGTCTCATCATCACGGG
pGADT7-MtATG13-R	CTCGAGTTATATCTGTGGCTTACTATCTCG
pPR3N-MtCAS31-F (MtCAS31-Nub-F)	GGCCATTACGGCCATGTCTCAATATCAACAAGGTTATGGT
pPR3N-MtCAS31-R (MtCAS31-Nub-F)	GGCCGCCTCGGCCCTAGTGTCCTTGTCCATGTCCAGTA
pPR3N-MtPIP2;7-F (MtPIP2;7-Nub-F)	GGCCATTACGGCCATGGGCAAAGATGTTGAGGTTCAA
pPR3N-MtPIP2;7-R (MtPIP2;7-Nub-R)	GGCCGAGGCGGCCTTAAGCATTGCTCCTGAAGGATCC
pBT3STE-MtPIP2;7-F (MtPIP2;7-Cub-F)	GGCCATTACGGCCTTATGGGCAAAGATGTTGAGGTTCAA
pBT3STE-MtPIP2;7-R (MtPIP2;7-Cub-R)	GGCCGAGGCGGCCGGAGCATTGCTCCTGAAGGATCC
Co-IP
pCAMBIA1300-MtATG8a-HA-F	TCTAGAATGTCCAAGCCTTCCTACAAGACTAAA
pCAMBIA1300-MtATG8a-HA-R	GTCGACGTTATCCAAAGGTTTCTCTTCAT
pCAMBIA1300-MtPIP2;7-MYC-F	ATAGC GGATCC TA ATGGGCAAAGATGTTGAGGTTCAA
pCAMBIA1300-MtPIP2;7-MYC-R	ATAGC GAGCTC TCAAGCATTGCTC CTGAAGGATC C
pMDC32-MtCAS31-F	TCTAGAATGGATTACAAAGATCATGATGGTGACTATAAGGACCACGACATCGATTACAAAGATGATGATGATAAATCTCAATATCAACAAGGTTA
pMDC32-MtCAS31-R	GAGCTCCTAGTGTCCTTGTCCATGTCC
pCAMBIA1307-Medtr6g12980-F	GTCGACATGGACGGATCAAATAGC
pCAMBIA1307-Medtr6g12980-R	ACTAGTAATTTTCTCTTCTGAGGTCT
GST pull-down
pET30a-MtCAS31-F	GATATGATGTCTCAATATCAACAAGGTTATG
pET30a-MtCAS31-R	CTCGAGTAGTGTCCTTGTCCATGTCCAGT
pGEX4T-1-MtPIP2;7-F	GAATTCATGGGCAAAGATGTTGAGGTTCAA
pGEX4T-1-MtPIP2;7-R	CTCGAGTTAAGCATTGCTCCTGAAGGATCC
Bimolecular Fluorescence Complementation
pUC-SPYNE(R)173-MtCAS31-F	GGATCCATGTCTCAATATCAACAAGGTTATG
pUC-SPYNE(R)173-MtCAS31-R	CTCGAGGTGTCCTTGTCCATGTCCAGT
pUC-SPYCE(MR)-MtPIP2;7-F	ACTAGTATGGGCAAAGATGTTGAGGTTCAA
pUC-SPYCE(MR)-MtPIP2;7-R	CTCGAGAGCATTGCTCCTGAAGGATCC
pUC-SPYCE(MR)-MtATG8a-F	GAGCTCATGGTGAGCA AGGGCGAGGAGCTG
pUC-SPYCE(MR)-MtATG8a-R	ACTAGTCTAATGGGAAATCAGATCTCCAAAGG
Hairy Root transformation
pCAMBIA2301-MtPIP2;7-F	GAGCTCATGGGCAAAGATGTTGAGGTTCAA
pCAMBIA2301-MtPIP2;7-R	CCTGCAGGTCACACGTGGTGGTGGTGGTGGTGGC
Real-time PCR
MtACTIN-realtime-F	CCCACTGGATGTCTGTAGGTT
MtACTIN-realtime-R	AGAATTAAGTAGCAGCGCAAA
MtCAS31-realtime-F	CATGGACATCATCAACAACATC
MtCAS31-realtime-R	CCACCAATGTCAGTGTTTCC
MtPIP2;7-realtime-F	TGCTAGGGATTCCCATGTTC
MtPIP2;7-realtime-R	CACTGATCATCCCAGGCTTT
Underlined bases indicate restriction enzyme sites.
