# Supplementary material
Source: publisher figshare collection journal article supplement (https://tandf.figshare.com/articles/dataset/_/9178736)
Supplement: Supplementary file 1 [file 1 › Data Set S2.xlsx]

## Sheet: Sheet1
Data Set S2. Accession numbers of genes used for the phylogentic analysis in this study
Sequence Name	Organism	GenBank Number
MtCAS31	Medicago truncatula	EU139871
MtPIP2;7	Medicago truncatula	NC_016408
MtATG8a	Medicago truncatula	XM_013599986.1
Medtr4g415300	Medicago truncatula	XP_013455159.1
Medtr1g095070	Medicago truncatula	XP_003591906.1
Medtr8g098375	Medicago truncatula	XP_013447045.1
Medtr7g101190	Medicago truncatula	XP_003625627.1
Medtr6g069040	Medicago truncatula	XP_003619795.1
Medtr5g082070	Medicago truncatula	XP_003616586.1
Medtr5g010150	Medicago truncatula	XP_003611079.1
Medtr3g118010	Medicago truncatula	XP_003604054.1
Medtr3g070210	Medicago truncatula	XP_003600863.1
Medtr4g048510	Medicago truncatula	XM_013600207.1
Medtr2g088230	Medicago truncatula	XR_003009598.1
Medtr1g101090	Medicago truncatula	XM_003608680.1
Medtr2g023430	Medicago truncatula	XM_013607380.1
Medtr1g086310	Medicago truncatula	XM_003591283.1
Medtr4g123760	Medicago truncatula	XM_024782862.1
Medtr3g095530(Actin)	Medicago truncatula	AC137836.25
At2g45960	Arabidopsis thaliana	NP_001078066.1
At3g53420	Arabidopsis thaliana	NP_190910.1
AtPIP2;7	Arabidopsis thaliana	NP_195236.1
AtPIP2;1	Arabidopsis thaliana	NP_181434.1
ZmPIP2;1	Zea mays	NP_001105027.1
ZmPIP2;7	Zea mays	NP_001237286.2
GmPIP2;7	Glycine max	XP_003540176.1
SoPIP2;1	Spinacia oleracea	XP_021861153.1
VvTIP1;2	Vitis vinifera	NP_001267958.1
OsPIP1;3	Oryza sativa	XP_015625572.1
OsPIP2;6	Oryza sativa	XP_015636702.1
OsTIP4;2	Oryza sativa	XP_015633962.1
OsTIP1;2	Oryza sativa	XP_015631095.1
ZmPIP1;2	Zea mays	NP_001104934.1
ZmTIP2;1	Zea mays	NP_001105030.1
GhPIP2;1	Gossypium hirsutum	NP_001314222.1
AtPIP2;5	Arabidopsis thaliana	NP_191042.1
AtNIP2;1	Arabidopsis thaliana	NP_180986.1
AtPIP2;8	Arabidopsis thaliana	NP_179277.1
AtTIP1;5	Arabidopsis thaliana	NP_190328.1
AtNIP1;4	Arabidopsis thaliana	NP_567178.1
GmPIP1;6	Glycine max	NP_001340567.1
GmPIP2;1	Glycine max	XP_003556232.1
LjNIP6;1	Lotus japonicus	ABY19374.1
ZmPIP1;1	Zea mays	NP_001105466.2
ZmPIP2;5	Zea mays	NP_001105616.1
ZmTIP1;2	Zea mays	NP_001105029.1
OsPIP2;4	Oryza sativa	AAP54303.2
OsPIP2;8	Oryza sativa	XP_015630805.1
OsSIP2;8	Oryza sativa	Q10M80.1
OsNIP3;3	Oryza sativa	XP_015620146.1
OsPIP2;7	Oryza sativa	XP_015651220.1
OsTIP2;2	Oryza sativa	XP_015643913.1
ZmNIP5;1	Zea mays	NP_001150784.1
ZmNIP2;2	Zea mays	NP_001105020.1
GmNIP5;1	Glycine max	XP_003535560.1
AtSIP2;1	Arabidopsis thaliana	NP_001190113.1
AtSIP1;2	Arabidopsis thaliana	NP_197330.1
GmMAN1	Glycine max	XM_006584570
