# Supplementary material
Source: publisher figshare collection journal article supplement (https://tandf.figshare.com/articles/dataset/_/9178736)

A

WT a GCAAAGATGTTGAGGTTCAAGAACAAGTGGTGAATTTTCAGCTAAGGATTACCAAGATCCACCACCAGCACCTTTGTTTGATTTAGATGAGTTAACAAAGT WT  
b GCAAAGATGTTGAGGTTCAAGAACAAGTGGTGAATTTTCAGCTAAGGATTACCAAGATCCACCACCAGCACCTTTGTTTGATTTAGATGAGTTAACAAAGT

*pip2;7-59*

**T0 generation**  
a GCAAAGATGTTGAGGTTCA-----GCTAAGGATTACCAAGATCCACCACCAGCACCTTTGTTTGATTTAGATGAGTTAACAAAGT -22  
b GCAAAGATGTTGAGGTTCA-----GCTAAGGATTACCAAGATCCACCACCAGCACCTTTGTTTGATTTAGATGAGTTAACAAAGT -22  
**T1 generation**  
a GCAAAGATGTTGAGGTTCA-----GCTAAGGATTACCAAGATCCACCACCAGCACCTTTGTTTGATTTAGATGAGTTAACAAAGT -22  
b GCAAAGATGTTGAGGTTCA-----GCTAAGGATTACCAAGATCCACCACCAGCACCTTTGTTTGATTTAGATGAGTTAACAAAGT -22

*pip2;7-69*

**T0 generation**  
a GCAAA-----GT -95  
b GCAAAGATGTTGAGGTT-----CACCTTTGTTTGATTTAGATGAGTTAACAAAGT -52  
**T1 generation**  
a GCAAA-----GT -95  
Line 1 b GCAAAGATGTTGAGGTT-----CACCTTTGTTTGATTTAGATGAGTTAACAAAGT -52  
  
a GCAAA-----GT -95  
Line 2 b GCAAA-----GT -95  
  
a GCAAAGATGTTGAGGTT-----CACCTTTGTTTGATTTAGATGAGTTAACAAAGT -52  
Line 3 b GCAAAGATGTTGAGGTT-----CACCTTTGTTTGATTTAGATGAGTTAACAAAGT -52

*pip2;7-77*

**T0 generation**  
a GCAAAGATGTTGAGGTTCA-----CAAAGT -77  
b G-----GCTAAGGATTACCAAGATCCACCACCAGCACCTTTGTTTGATTTAGATGAGTTAACAAAGT -40  
**T1 generation**  
a GCAAAGATGTTGAGGTTCA-----CAAAGT -77  
Line 1 b G-----GCTAAGGATTACCAAGATCCACCACCAGCACCTTTGTTTGATTTAGATGAGTTAACAAAGT -40  
  
a G-----GCTAAGGATTACCAAGATCCACCACCAGCACCTTTGTTTGATTTAGATGAGTTAACAAAGT -40  
Line 2 b G-----GCTAAGGATTACCAAGATCCACCACCAGCACCTTTGTTTGATTTAGATGAGTTAACAAAGT -40  
  
a GCAAAGATGTTGAGGTTCA-----CAAAGT -77  
Line 3 b GCAAAGATGTTGAGGTTCA-----CAAAGT -77

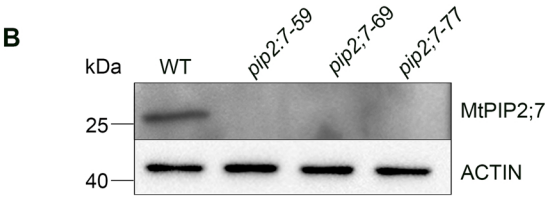

Supplement: Supplementary file 1 [file 1 › FS6.pdf]
