# Supplementary material
Source: publisher figshare collection journal article supplement (https://tandf.figshare.com/articles/dataset/_/9178736)
Supplement: Supplementary file 1 [file 1 › Table S1.docx]

**Table S1**. Screen of *M.truncatula* cDNA library with MtCAS31

| Gene ID | Annotation | Clone Numbers |
| --- | --- | --- |
| Medtr2g094270.1 | Aquaporin | 5 |
| Medtr4g007080.1 | NDH-dependent cyclic electron flow protein | 4 |
| Medtr2g023500.5 | Lactoylglutathione lyase-like protein | 2 |
| Medtr6g086300.2 | Cytosolic aldehyde dehydrogenase | 2 |
| Medtr2g035320.1 | ABA-responsive protein | 2 |
| Medtr2g007930.1 | Tubby-F-box-like protein | 2 |
| Medtr2g074980.1 | LRR receptor-like kinase | 2 |
| Medtr5g098310.2 | Acetyl-CoA acetyltransferase, cytosolic | 2 |
| Medtr4g103920 | Glyceraldehyde-3-phosphate dehydrogenase | 2 |
| Medtr4g033155.1 | Transmembrane protein | 1 |
| Medtr1g094065.1 | Peptidyl-prolyl cis-trans isomerase | 1 |
| Medtr0684s0020.1 | Legume lectin beta domain protein | 1 |
| Medtr3g065950.1 | Senescence-associated protein | 1 |
| Medtr0049s0090.1 | Cellulose synthase-like protein | 1 |
| Medtr7g021825.1 | Aldo/keto reductase family oxidoreductase | 1 |
| Medtr3g115920.2 | glyceraldehyde-3-phosphate dehydrogenase B | 1 |
| Medtr1g022255.1 | Gethyltransferase PMT16, putative | 1 |
| Medtr3g087030.2 | Molecular chaperone Hsp40/DnaJ family protein | 1 |
| Medtr7g098430.1 | Pre-mRNA-processing factor 39 | 1 |
| Medtr2g105010.1 | CBL-interacting kinase | 1 |
| Medtr8g026680.1 | Rac GTPase activating protein | 1 |
| Medtr5g014820.1 | Cysteine desulfurase-like protein | 1 |
| Medtr2g025640.1 | Fumarylacetoacetase | 1 |
| Medtr6g011390.1 | porin/voltage-dependent anion-selective channel protein | 1 |
| Medtr5g082580.1 | Phosphoinositide-specific phospholipase C family protein | 1 |
| Medtr4g013300.1 | SEC14 cytosolic factor family protein | 1 |
| Medtr5g080440 | Leghemoglobin 120-1 | 1 |
| Medtr3g463720.1 | RING/U-box protein | 1 |
| Medtr4g084190.1 | Scavenger mRNA decapping enzyme carboxy-term-binding protein | 1 |
| Medtr7g099040.1 | Zn-dependent alcohol dehydrogenase family, class III protein | 1 |
| Medtr2g034640.1 | Ras-related small GTP-binding family protein | 1 |
| Medtr6g009330.1 | Aldose reductase | 1 |
| Medtr5g033650.1 | Carboxyl-terminal proteinase-like protein | 1 |
| Medtr6g023380.1 | Elongation factor P | 1 |
| Medtr6g083800.1 | Pathogenesis-related protein 4b | 1 |
