# Supplementary material
Source: publisher figshare collection journal article supplement (https://tandf.figshare.com/articles/dataset/_/9178736)

**A** (i)

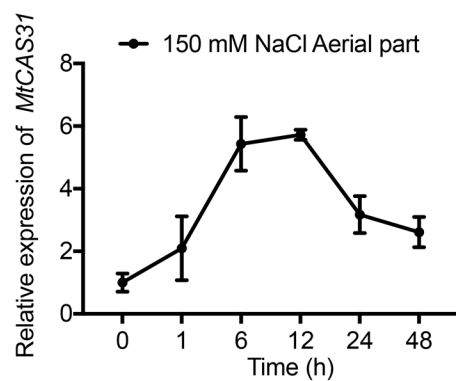

(ii)

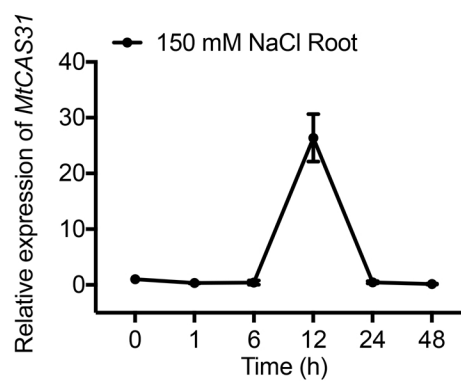

**B** (i)

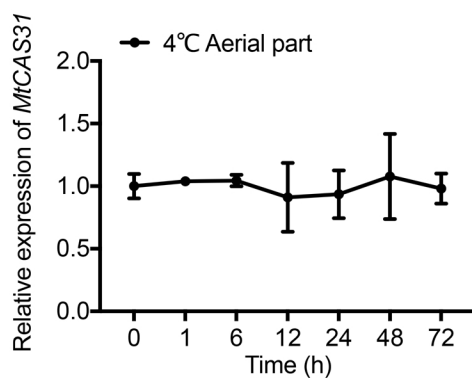

(ii)

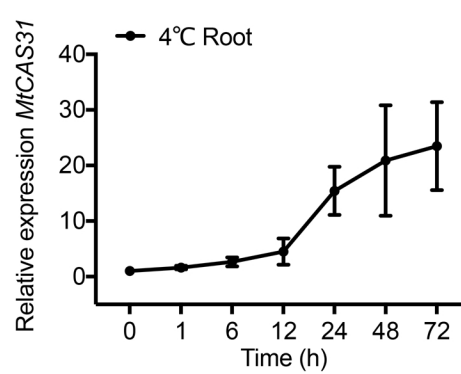

**C** (i)

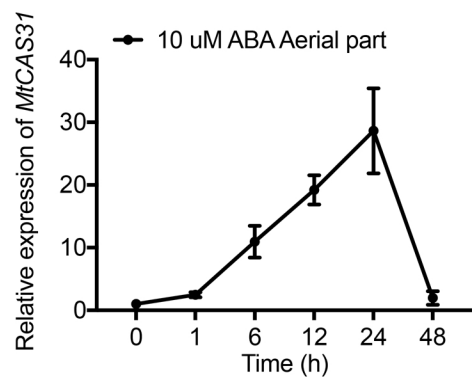

(ii)

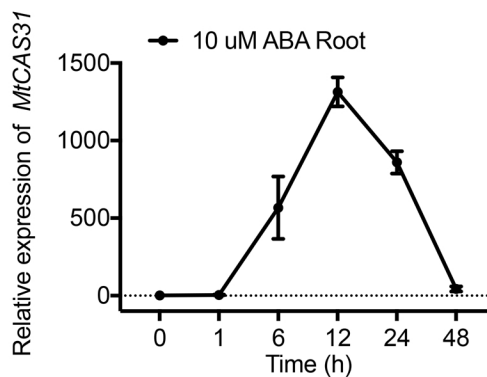

Supplement: Supplementary file 1 [file 1 › FS1.pdf]

**A**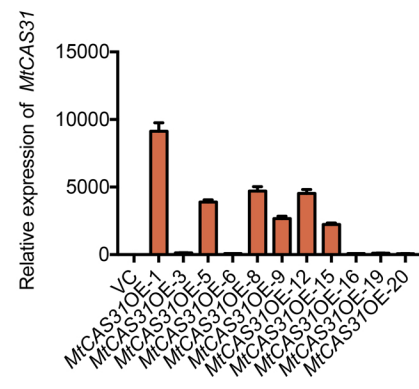**B**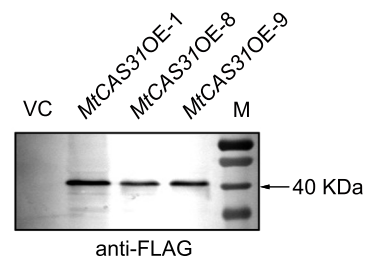

Supplement: Supplementary file 1 [file 1 › FS2.pdf]

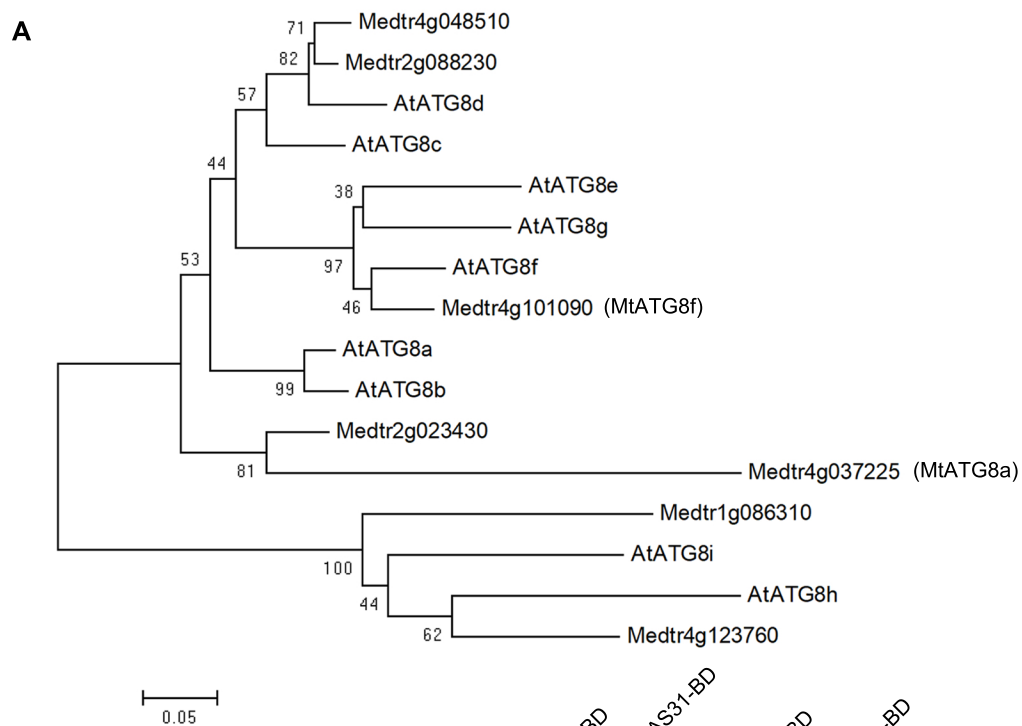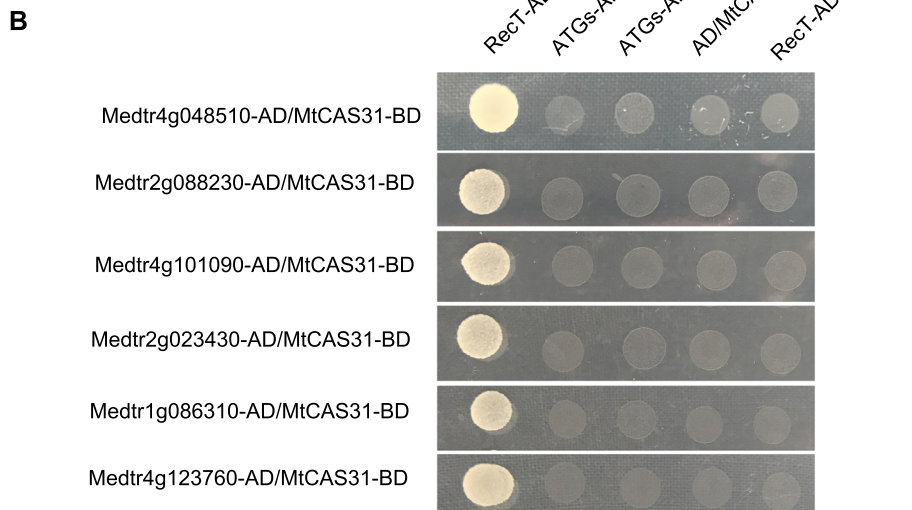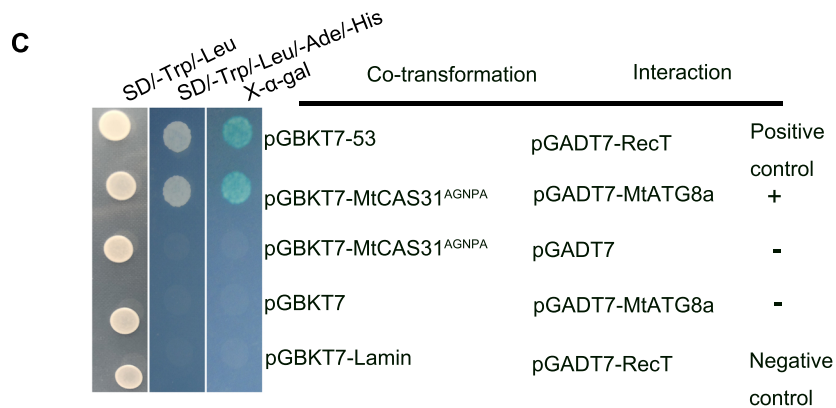

Supplement: Supplementary file 1 [file 1 › FS3.pdf]

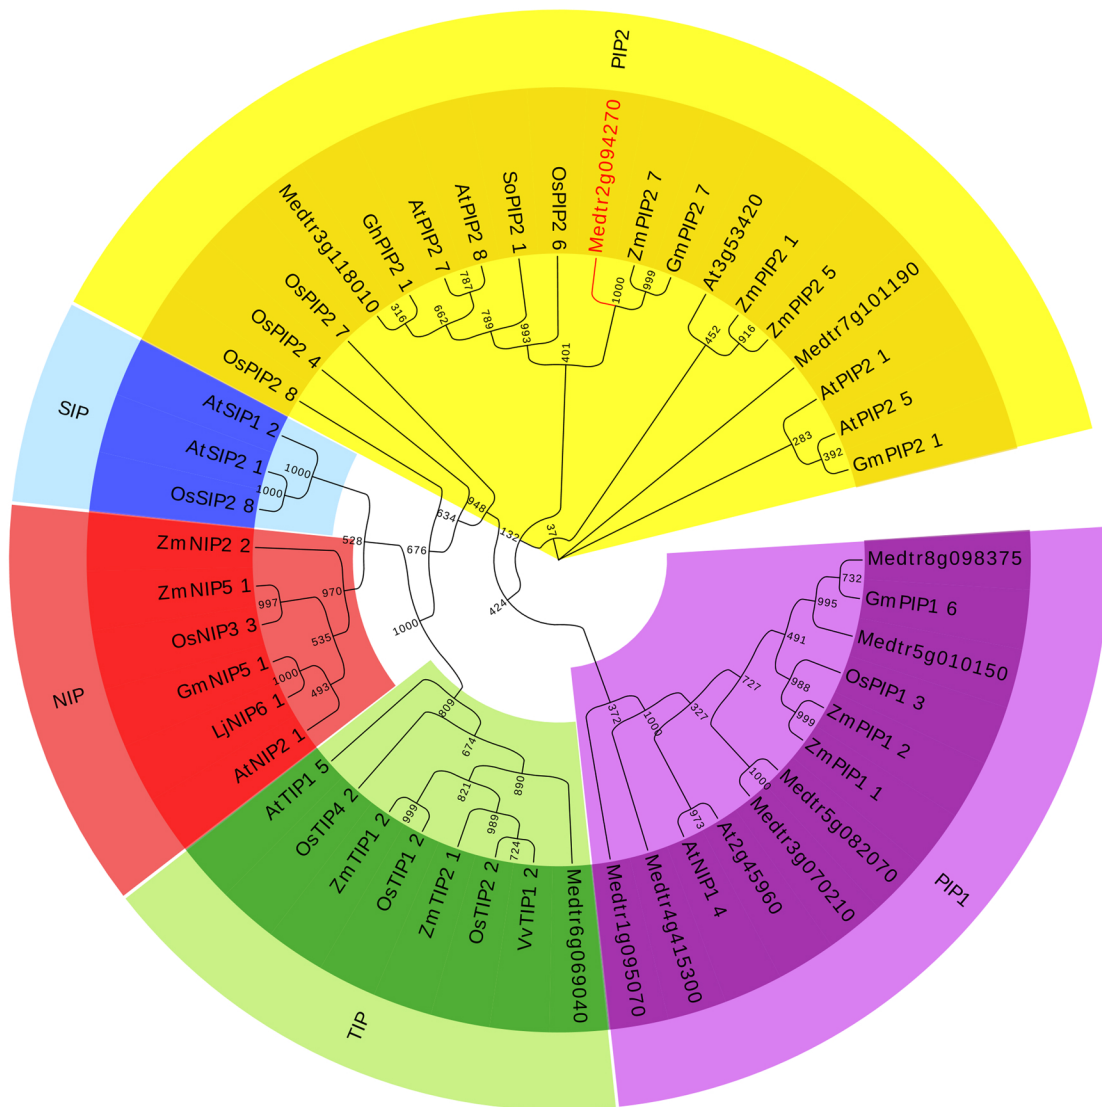

Supplement: Supplementary file 1 [file 1 › FS4.pdf]

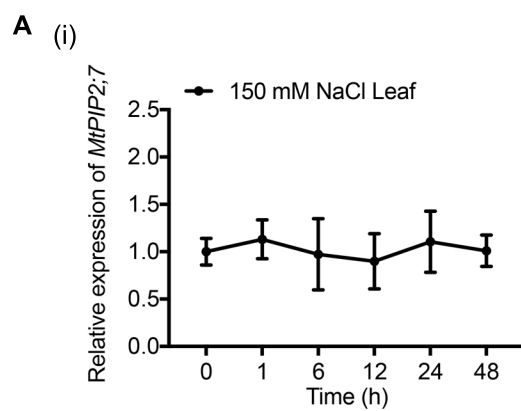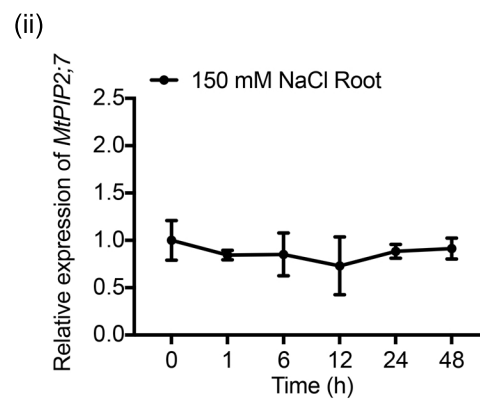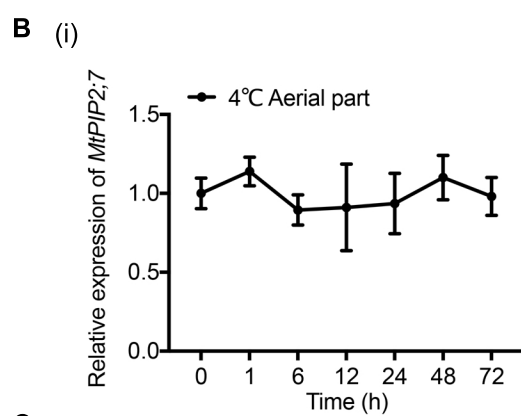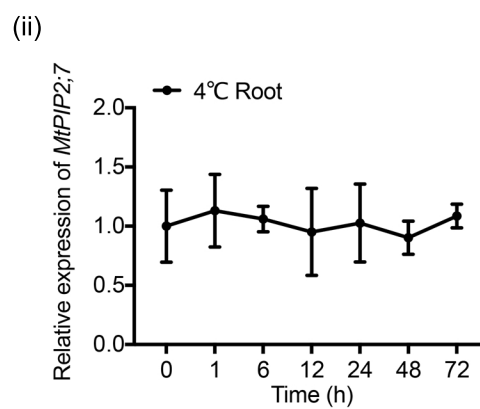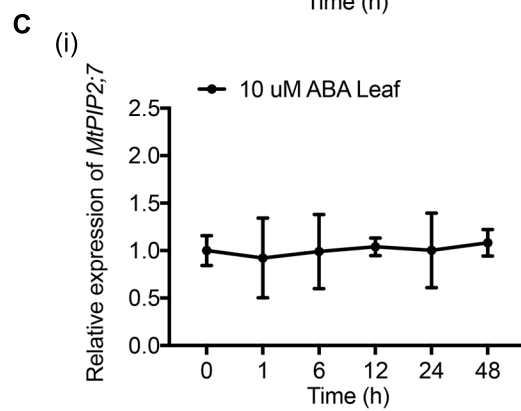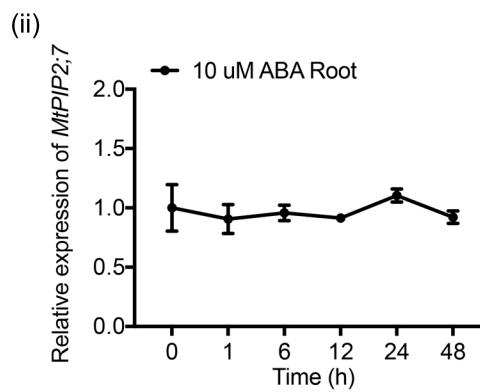

Supplement: Supplementary file 1 [file 1 › FS5.pdf]

**A**

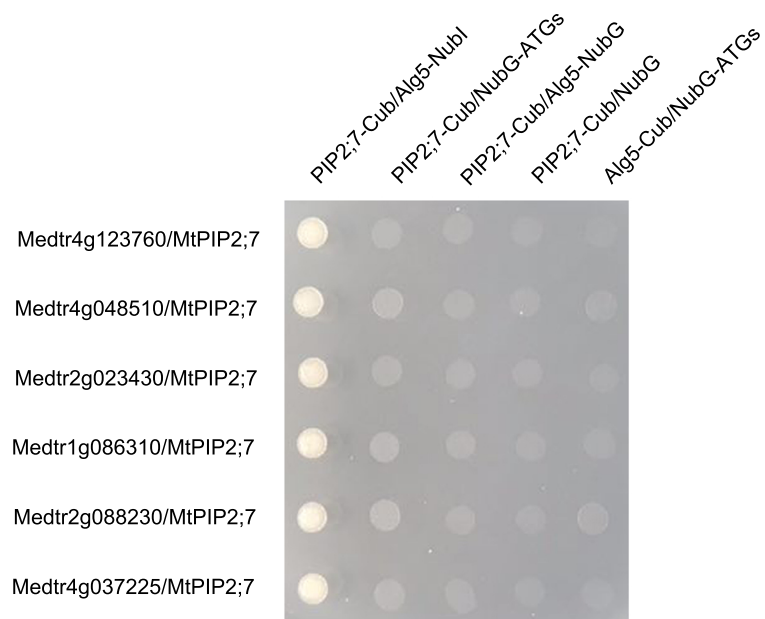

**B**

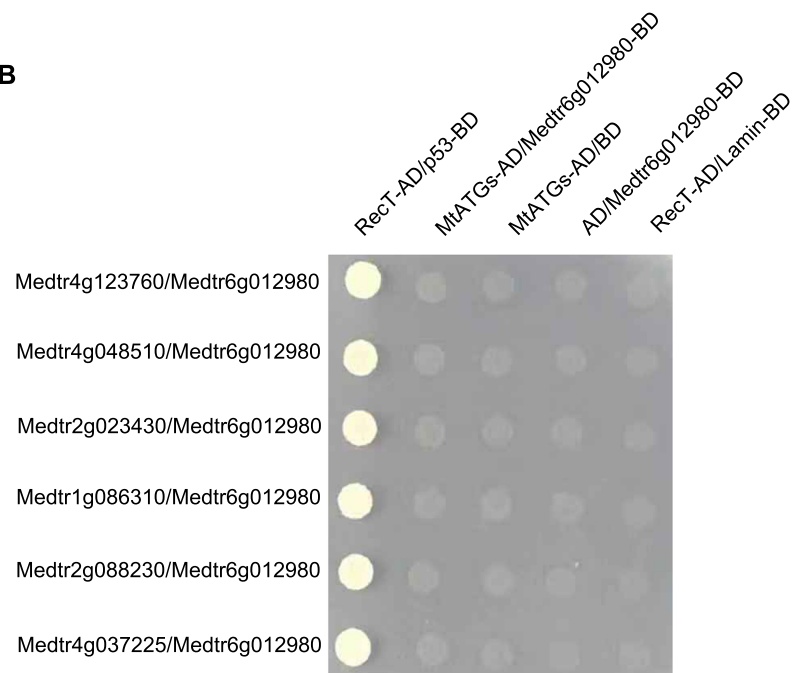

Supplement: Supplementary file 1 [file 1 › FS7.pdf]
